# Supplementary material
Source: MDPI journal article supplement (https://www.mdpi.com/2072-4292/11/20/2384)
Supplement: s1 [file s1]

**Supplementary Materials**

**Table S1.** Descriptive statistics of remote VIs derived from Landsat imagery during growing period of durum wheat in 2010.

| **BBCH** | **Mean** | **Median** | **Min** | **Max** | **SD** | **CV%** | **K-S** |
| --- | --- | --- | --- | --- | --- | --- | --- |
|  |  |  | NDVI |  |  |  |  |
| 31 | 0.29 | 0.29 | 0.23 | 0.35 | 0.03 | 8.8 | ns |
| 32 | 0.29 | 0.29 | 0.24 | 0.36 | 0.03 | 11.5 | ns |
| 36 | 0.59 | 0.58 | 0.44 | 0.71 | 0.08 | 13.6 | * |
| 43 | 0.71 | 0.72 | 0.5 | 0.83 | 0.10 | 14.2 | * |
| 55 | 0.66 | 0.68 | 0.51 | 0.73 | 0.06 | 8.7 | ns |
|  |  |  | EVI |  |  |  |  |
| 31 | 0.31 | 0.31 | 0.24 | 0.36 | 0.03 | 9.8 | ns |
| 32 | 0.33 | 0.33 | 0.27 | 0.4 | 0.04 | 10.9 | ns |
| 36 | 0.49 | 0.49 | 0.34 | 0.63 | 0.09 | 17.4 | ** |
| 43 | 0.66 | 0.65 | 0.44 | 0.83 | 0.12 | 17.7 | ns |
| 55 | 0.73 | 0.74 | 0.48 | 0.83 | 0.07 | 10.1 | ** |
|  |  |  | SAVI |  |  |  |  |
| 31 | 0.17 | 0.17 | 0.14 | 0.2 | 0.02 | 9.1 | ns |
| 32 | 0.19 | 0.19 | 0.16 | 0.23 | 0.02 | 9.3 | ns |
| 36 | 0.30 | 0.30 | 0.22 | 0.37 | 0.05 | 15.3 | ** |
| 43 | 0.40 | 0.40 | 0.29 | 0.49 | 0.06 | 14.8 | ns |
| 55 | 0.44 | 0.45 | 0.3 | 0.5 | 0.04 | 9.3 | ns |
|  |  |  | GNDVI |  |  |  |  |
| 31 | 0.21 | 0.21 | 0.18 | 0.24 | 0.02 | 7.4 | ns |
| 32 | 0.23 | 0.23 | 0.2 | 0.27 | 0.02 | 8.1 | ns |
| 36 | 0.39 | 0.39 | 0.3 | 0.48 | 0.05 | 13.1 | ns |
| 43 | 0.49 | 0.49 | 0.37 | 0.58 | 0.06 | 12.9 | ns |
| 55 | 0.51 | 0.51 | 0.37 | 0.55 | 0.04 | 7.9 | ** |
|  |  |  | GCI |  |  |  |  |
| 31 | 0.53 | 0.54 | 0.44 | 0.62 | 0.05 | 9.3 | ns |
| 32 | 0.60 | 0.60 | 0.5 | 0.72 | 0.06 | 10.5 | ns |
| 36 | 1.33 | 1.30 | 0.88 | 1.83 | 0.28 | 21.1 | ns |
| 43 | 2.06 | 2.00 | 1.24 | 2.83 | 0.49 | 23.9 | ns |
| 55 | 2.10 | 2.10 | 1.21 | 2.47 | 0.29 | 13.7 | ns |
|  |  |  | SR |  |  |  |  |
| 31 | 1.72 | 1.73 | 1.57 | 1.87 | 0.08 | 4.6 | ns |
| 32 | 1.72 | 1.71 | 1.55 | 1.91 | 0.1 | 5.8 | ns |
| 36 | 2.93 | 2.84 | 2.17 | 3.73 | 0.48 | 16.4 | ** |
| 43 | 4.14 | 3.95 | 2.63 | 5.64 | 0.94 | 22.7 | ns |
| 55 | 4.01 | 4.03 | 2.65 | 4.55 | 0.43 | 10.7 | ns |

SD, standard deviation; CV, coefficient of variation; K-S, Kolmogorov–Smirnov test for normal distribution;ns, non-significant; *, significant at *P* ≤ 0.05; **, significant at *P* ≤ 0.01.

**Table S2.** Descriptive statistics of remote VIs derived from Landsat imagery during growing period of sunflower in 2011.

| **BBCH** | **Mean** | **Median** | **Min** | **Max** | **SD** | **CV%** | **K-S** |
| --- | --- | --- | --- | --- | --- | --- | --- |
|  |  |  | NDVI |  |  |  |  |
| 30 | 0.47 | 0.48 | 0.39 | 0.54 | 0.02 | 4.8 | ns |
| 32 | 0.66 | 0.66 | 0.57 | 0.73 | 0.04 | 6.5 | ns |
| 51 | 0.70 | 0.7 | 0.56 | 0.79 | 0.06 | 9.2 | ** |
| 67 | 0.52 | 0.55 | 0.35 | 0.64 | 0.09 | 16.2 | ** |
| 75 | 0.28 | 0.28 | 0.21 | 0.38 | 0.03 | 12.2 | ns |
|  |  |  | EVI |  |  |  |  |
| 30 | 0.51 | 0.52 | 0.44 | 0.56 | 0.03 | 5.8 | * |
| 32 | 0.90 | 0.91 | 0.7 | 1.09 | 0.12 | 12.8 | ** |
| 51 | 0.76 | 0.76 | 0.55 | 0.92 | 0.11 | 14.4 | ** |
| 67 | 0.54 | 0.55 | 0.35 | 0.71 | 0.1 | 19 | ns |
| 75 | 0.24 | 0.24 | 0.19 | 0.31 | 0.02 | 10.2 | ns |
|  |  |  | SAVI |  |  |  |  |
| 30 | 0.32 | 0.33 | 0.28 | 0.35 | 0.02 | 5.4 | ** |
| 32 | 0.52 | 0.52 | 0.4 | 0.61 | 0.06 | 10.7 | ns |
| 51 | 0.49 | 0.49 | 0.37 | 0.58 | 0.06 | 12.4 | ** |
| 67 | 0.34 | 0.35 | 0.24 | 0.44 | 0.06 | 16.5 | ns |
| 75 | 0.16 | 0.16 | 0.13 | 0.19 | 0.01 | 9.3 | ns |
|  |  |  | GNDVI |  |  |  |  |
| 30 | 0.37 | 0.38 | 0.33 | 0.39 | 0.02 | 4.2 | ** |
| 32 | 0.53 | 0.54 | 0.45 | 0.6 | 0.04 | 7.5 | ns |
| 51 | 0.55 | 0.55 | 0.45 | 0.62 | 0.05 | 8.5 | ** |
| 67 | 0.40 | 0.41 | 0.31 | 0.48 | 0.05 | 12.8 | ** |
| 75 | 0.22 | 0.22 | 0.19 | 0.26 | 0.02 | 7.7 | ns |
|  |  |  | GCI |  |  |  |  |
| 30 | 1.19 | 1.21 | 1.01 | 1.31 | 0.08 | 6.4 | ns |
| 32 | 2.33 | 2.33 | 1.64 | 3 | 0.37 | 15.8 | ns |
| 51 | 2.49 | 2.51 | 1.72 | 3.23 | 0.45 | 18.2 | * |
| 67 | 1.39 | 1.42 | 0.91 | 1.9 | 0.28 | 20.5 | ns |
| 75 | 0.57 | 0.56 | 0.46 | 0.72 | 0.06 | 9.8 | ns |
|  |  |  | SR |  |  |  |  |
| 30 | 2.42 | 2.43 | 2.23 | 2.6 | 0.09 | 3.9 | ns |
| 32 | 4.17 | 4.16 | 3.15 | 5.3 | 0.61 | 14.7 | ** |
| 51 | 4.53 | 4.53 | 3.15 | 5.95 | 0.86 | 19 | * |
| 67 | 2.81 | 2.85 | 2 | 3.72 | 0.49 | 17.5 | ns |
| 75 | 1.62 | 1.62 | 1.46 | 1.81 | 0.08 | 5.2 | ns |

SD, standard deviation; CV, coefficient of variation; KS, Kolmogorov–Smirnov test for normal distribution;ns, non-significant; *, significant at *P* ≤ 0.05; **, significant at *P* ≤ 0.01.

**Table S3.** Descriptive statistics of remote VIs derived from Landsat imagery during growing period of bread wheat in 2012.

| **BBCH** | **Mean** | **Median** | **Min** | **Max** | **SD** | **CV%** | **K-S** |
| --- | --- | --- | --- | --- | --- | --- | --- |
|  |  |  | NDVI |  |  |  |  |
| 33 | 0.47 | 0.46 | 0.37 | 0.61 | 0.07 | 14.6 | ** |
| 36 | 0.54 | 0.50 | 0.44 | 0.67 | 0.08 | 14.1 | * |
| 41 | 0.52 | 0.51 | 0.4 | 0.61 | 0.06 | 12.3 | * |
| 63 | 0.80 | 0.81 | 0.64 | 0.88 | 0.06 | 7.3 | ** |
| 83 | 0.51 | 0.51 | 0.46 | 0.56 | 0.03 | 5.3 | ns |
|  |  |  | EVI |  |  |  |  |
| 33 | 0.45 | 0.43 | 0.35 | 0.58 | 0.07 | 16.7 | ** |
| 36 | 0.34 | 0.38 | 0.01 | 0.71 | 0.27 | 79.2 | * |
| 41 | 0.30 | 0.43 | –0.12 | 0.5 | 0.2 | 67.8 | * |
| 63 | 0.11 | 0.11 | 0.02 | 0.13 | 0.03 | 23.8 | * |
| 83 | 0.54 | 0.58 | 0.14 | 0.65 | 0.11 | 19.8 | * |
|  |  |  | SAVI |  |  |  |  |
| 33 | 0.25 | 0.24 | 0.21 | 0.32 | 0.04 | 14.4 | ** |
| 36 | 0.18 | 0.20 | 0 | 0.36 | 0.14 | 80.0 | * |
| 41 | 0.10 | 0.15 | –0.01 | 0.18 | 0.07 | 69.4 | * |
| 63 | 0.45 | 0.47 | 0.1 | 0.54 | 0.1 | 23.3 | * |
| 83 | 0.28 | 0.30 | 0.07 | 0.34 | 0.06 | 20.3 | * |
|  |  |  | GNDVI |  |  |  |  |
| 33 | 0.33 | 0.32 | 0.28 | 0.39 | 0.04 | 11.1 | * |
| 36 | 0.14 | 0.22 | –0.27 | 0.42 | 0.24 | 168.3 | * |
| 41 | –0.73 | –0.16 | –11.14 | 0.14 | 1.31 | 179.3 | * |
| 63 | 0.53 | 0.57 | 0.06 | 0.63 | 0.13 | 25.1 | * |
| 83 | 0.32 | 0.35 | –0.08 | 0.41 | 0.1 | 31.4 | * |
|  |  |  | GCI |  |  |  |  |
| 33 | 1.00 | 0.95 | 0.78 | 1.31 | 0.17 | 17.0 | * |
| 36 | 0.60 | 0.73 | –0.25 | 1.5 | 0.69 | 114.4 | * |
| 41 | 0.21 | 0.38 | –0.27 | 0.44 | 0.26 | 122.7 | * |
| 63 | 2.61 | 2.69 | 0.45 | 3.49 | 0.75 | 29.0 | ** |
| 83 | 1.05 | 1.10 | 0.12 | 1.39 | 0.27 | 25.5 | * |
|  |  |  | SR |  |  |  |  |
| 33 | 2.28 | 2.20 | 1.91 | 2.84 | 0.3 | 13.1 | ** |
| 36 | 1.89 | 1.97 | 0.77 | 3.25 | 0.94 | 49.6 | * |
| 41 | 1.21 | 1.37 | 0.73 | 1.46 | 0.26 | 21.9 | * |
| 63 | 4.87 | 5.00 | 1.68 | 6.37 | 1.2 | 24.7 | ns |
| 83 | 2.33 | 2.38 | 1.2 | 2.79 | 0.32 | 13.6 | * |

SD, standard deviation; CV, coefficient of variation; K-S, Kolmogorov–Smirnov test for normal distribution;ns, non-significant; *, significant at *P* ≤ 0.05; **, significant at *P* ≤ 0.01.

**Table S4.** Descriptive statistics of remote VIs derived from Landsat imagery during growing period of coriander in 2013.

| **BBCH** | **Mean** | **Median** | **Min** | **Max** | **SD** | **CV%** | **K-S** |
| --- | --- | --- | --- | --- | --- | --- | --- |
|  |  |  | NDVI |  |  |  |  |
| 34 | 0.08 | 0.08 | 0.07 | 0.08 | 0 | 2.7 | ** |
| 55 | 0.33 | 0.34 | 0.25 | 0.38 | 0.04 | 10.6 | ** |
| 63 | 0.62 | 0.63 | 0.46 | 0.7 | 0.07 | 11.2 | * |
| 71 | 0.68 | 0.70 | 0.5 | 0.78 | 0.08 | 12.0 | * |
| 81 | 0.65 | 0.66 | 0.51 | 0.74 | 0.07 | 10.3 | * |
|  |  |  | EVI |  |  |  |  |
| 34 | 0.27 | 0.27 | 0.25 | 0.29 | 0.01 | 3.3 | ns |
| 55 | 0.43 | 0.43 | 0.4 | 0.45 | 0.01 | 2.6 | ns |
| 63 | 0.59 | 0.60 | 0.43 | 0.71 | 0.09 | 15.8 | * |
| 71 | 0.64 | 0.66 | 0.5 | 0.73 | 0.07 | 11.1 | * |
| 81 | 0.63 | 0.65 | 0.5 | 0.69 | 0.05 | 8.4 | * |
|  |  |  | SAVI |  |  |  |  |
| 34 | 0.08 | 0.08 | 0.08 | 0.09 | 0 | 2.0 | ns |
| 55 | 0.28 | 0.29 | 0.23 | 0.32 | 0.02 | 8.3 | ** |
| 63 | 0.43 | 0.44 | 0.34 | 0.51 | 0.06 | 13.0 | * |
| 71 | 0.53 | 0.54 | 0.43 | 0.59 | 0.05 | 9.5 | * |
| 81 | 0.45 | 0.46 | 0.38 | 0.49 | 0.03 | 6.7 | * |
|  |  |  | GNDVI |  |  |  |  |
| 34 | 0.11 | 0.11 | 0.1 | 0.11 | 0 | 1.9 | ns |
| 55 | 0.37 | 0.37 | 0.29 | 0.41 | 0.03 | 8.1 | * |
| 63 | 0.60 | 0.61 | 0.52 | 0.65 | 0.04 | 7.3 | * |
| 71 | 0.67 | 0.68 | 0.57 | 0.72 | 0.05 | 7.0 | * |
| 81 | 0.62 | 0.63 | 0.55 | 0.66 | 0.03 | 5.3 | * |
|  |  |  | GCI |  |  |  |  |
| 34 | 0.24 | 0.24 | 0.23 | 0.25 | 0.01 | 2.2 | ns |
| 55 | 1.16 | 1.20 | 0.83 | 1.38 | 0.14 | 12.3 | * |
| 63 | 3.06 | 3.12 | 2.19 | 3.74 | 0.52 | 17.1 | * |
| 71 | 4.19 | 4.33 | 2.82 | 5.31 | 0.8 | 19.0 | * |
| 81 | 3.36 | 3.49 | 2.49 | 3.92 | 0.43 | 12.9 | * |
|  |  |  | SR |  |  |  |  |
| 34 | 1.17 | 1.16 | 1.15 | 1.18 | 0 | 0.4 | ** |
| 55 | 2.01 | 2.05 | 1.67 | 2.24 | 0.15 | 7.7 | ** |
| 63 | 3.34 | 3.40 | 2.52 | 3.99 | 0.5 | 14.9 | * |
| 71 | 5.86 | 6.02 | 3.73 | 7.9 | 1.32 | 22.5 | * |
| 81 | 4.52 | 4.68 | 3.24 | 5.36 | 0.66 | 14.6 | * |

SD, standard deviation; CV, coefficient of variation; K-S, Kolmogorov–Smirnov test for normal distribution;ns, non-significant; *, significant at *P* ≤ 0.05; **, significant at *P* ≤ 0.01.

**Table S5.** Descriptive statistics of remote VIs derived from Landsat imagery during growing period of bread wheat in 2014.

| **BBCH** | **Mean** | **Median** | **Min** | **Max** | **SD** | **CV%** | **K-S** |
| --- | --- | --- | --- | --- | --- | --- | --- |
|  |  |  | NDVI |  |  |  |  |
| 32 | 0.69 | 0.68 | 0.57 | 0.8 | 0.07 | 10.8 | ** |
| 37 | 0.79 | 0.78 | 0.69 | 0.85 | 0.05 | 6.0 | ** |
| 55 | 0.84 | 0.84 | 0.78 | 0.87 | 0.03 | 3.0 | ** |
| 77 | 0.81 | 0.83 | 0.7 | 0.87 | 0.05 | 5.7 | * |
| 85 | 0.40 | 0.45 | 0.19 | 0.55 | 0.1 | 25.6 | * |
|  |  |  | EVI |  |  |  |  |
| 32 | 0.45 | 0.43 | 0.35 | 0.55 | 0.07 | 15.6 | ** |
| 37 | 0.59 | 0.57 | 0.48 | 0.69 | 0.07 | 12.2 | * |
| 55 | 0.78 | 0.78 | 0.69 | 0.85 | 0.05 | 5.9 | ns |
| 77 | 0.59 | 0.60 | 0.47 | 0.67 | 0.05 | 9.2 | ** |
| 85 | 0.38 | 0.41 | 0.24 | 0.5 | 0.08 | 20.9 | * |
|  |  |  | SAVI |  |  |  |  |
| 32 | 0.41 | 0.39 | 0.32 | 0.49 | 0.05 | 13.3 | ** |
| 37 | 0.61 | 0.60 | 0.52 | 0.7 | 0.06 | 9.9 | * |
| 55 | 0.57 | 0.57 | 0.52 | 0.61 | 0.03 | 4.9 | ** |
| 77 | 0.49 | 0.50 | 0.41 | 0.54 | 0.04 | 7.7 | ** |
| 85 | 0.28 | 0.28 | 0.2 | 0.38 | 0.05 | 19.2 | ns |
|  |  |  | GNDVI |  |  |  |  |
| 32 | 0.60 | 0.59 | 0.52 | 0.67 | 0.05 | 8.3 | ** |
| 37 | 0.59 | 0.58 | 0.52 | 0.65 | 0.05 | 7.6 | ** |
| 55 | 0.72 | 0.72 | 0.67 | 0.75 | 0.02 | 3.4 | ** |
| 77 | 0.65 | 0.66 | 0.57 | 0.7 | 0.03 | 5.2 | ** |
| 85 | 0.40 | 0.38 | 0.29 | 0.53 | 0.07 | 17.2 | * |
|  |  |  | GCI |  |  |  |  |
| 32 | 3.11 | 2.86 | 2.24 | 4.18 | 0.65 | 21.1 | * |
| 37 | 2.97 | 2.81 | 2.2 | 3.82 | 0.55 | 18.7 | * |
| 55 | 5.13 | 5.15 | 4.09 | 6 | 0.6 | 11.6 | ** |
| 77 | 3.85 | 3.90 | 2.79 | 4.62 | 0.53 | 13.8 | ** |
| 85 | 1.43 | 1.27 | 0.86 | 2.37 | 0.43 | 30.2 | * |
|  |  |  | SR |  |  |  |  |
| 32 | 5.05 | 4.53 | 3.43 | 7.23 | 1.29 | 25.6 | * |
| 37 | 7.49 | 7.12 | 5.21 | 10.09 | 1.68 | 22.4 | * |
| 55 | 6.26 | 6.31 | 5.25 | 7.09 | 0.57 | 9.1 | ** |
| 77 | 4.78 | 4.87 | 3.58 | 5.6 | 0.57 | 12.0 | ** |
| 85 | 2.43 | 2.45 | 1.72 | 3.5 | 0.48 | 19.7 | ns |

SD, standard deviation; CV, coefficient of variation; K-S, Kolmogorov–Smirnov test for normal distribution;ns, non-significant; *, significant at *P* ≤ 0.05; **, significant at *P* ≤ 0.01.
